# Supplementary material
Source: PubMed Central journal article supplement (PMC7271937)
Supplement: mmc1.pdf [file mmc1.pdf]

# COVID-19-Associated Collapsing Glomerulopathy: An Emerging Entity

## Supplemental references

- S1. Markowitz GS, Nasr SH, Stokes MB, D'Agati VD. Treatment with IFN- $\alpha$ ,  $\beta$ , or  $\gamma$  is associated with collapsing focal segmental glomerulosclerosis. *Clin J Am Soc Nephrol*. 2010;5(4):607-615.
- S2. Markowitz GS, Appel GB, Fine PL, et al. Collapsing focal segmental glomerulosclerosis following treatment with high-dose pamidronate. *J Am Soc Nephrol*. 2001;12(6):1164-1172.
- S3. Kukull B, Avasare RS, Smith KD, Houghton DC, Troxell ML, Andeen NK. Collapsing glomerulopathy in older adults. *Mod Pathol*. 2019;32(4):532-538.
- S4. Chandra P, Kopp JB. Viruses and collapsing glomerulopathy: a brief critical review. *Clin Kidney J*. 2013;6(1):1-5.
- S5. Uzureau S, Lecordier L, Uzureau P, et al. APOL1 C-Terminal Variants May Trigger Kidney Disease through Interference with APOL3 Control of Actomyosin. *Cell Rep*. 2020;30(11):3821-3836 e3813.
- S6. Larsen CP, Bourne TD, Wilson JD, Saqqa O, Sharshir MA. Collapsing Glomerulopathy in a Patient With Coronavirus Disease 2019 (COVID-19). *Kidney Int Rep*. 2020.
- S7. Peleg Y, Kudose S, D'Agati VD, et al. Acute Kidney Injury Due to Collapsing Glomerulopathy Following COVID-19 Infection. *Kidney International Reports*. 2020.
- S8. Kissling S, Rotman S, Gerber C, et al. Collapsing glomerulopathy in a COVID-19 patient. *Kidney International*.
- S9. Ye M, Wysocki J, William J, Soler MJ, Cokic I, Battle D. Glomerular localization and expression of Angiotensin-converting enzyme 2 and Angiotensin-converting enzyme: implications for albuminuria in diabetes. *J Am Soc Nephrol*. 2006;17(11):3067-3075.
- S10. Nichols B, Jog P, Lee JH, et al. Innate immunity pathways regulate the nephropathy gene Apolipoprotein L1. *Kidney Int*. 2015;87(2):332-342.
